# Supplementary material
Source: Royal Society of Chemistry journal article supplement (doi:10.1039/d6ay00161k)
Supplement: d6ay00161k1.pdf [file d6ay00161k1.pdf]

DNA-mediated synergistic proximity ligation for ultrasensitive  
electrochemiluminescence detection of microcystin-LR

Hongfang Gao,<sup>\*a</sup> Rong Xiao,<sup>a</sup> Taotao Ma,<sup>a</sup> Xiaolin Yang,<sup>b</sup> Shangxian Ma<sup>c</sup>

<sup>a</sup> Jiangsu Key Laboratory for Recognition and Remediation of Emerging Pollutants in Taihu Basin, School of Environmental Science and Engineering, Wuxi University, Jiangsu 214105, China

<sup>b</sup> Key Laboratory of Analytical Chemistry for Life Science of Shaanxi Province, School of Chemistry and Chemical Engineering, Shaanxi Normal University, Xi'an 710062, P.R. China

<sup>c</sup> Ningxia Hui Autonomous Region Hydrology and Water Resources Monitoring and Warning Center, Ningxia, 750000, P.R. China.

E-mail: [hfgao@cw Xu.edu.cn](mailto:hfgao@cw Xu.edu.cn)

## Materials and apparatus

Microcystin-LR (MC-LR), MC-RR, MC-YR, gonyautoxin 1/4 and nodularin were purchased from Qingdao Pribolab Bioengineering Co., Ltd. (Qingdao, China). Tris(2,2'-bipyridyl)dichlororuthenium(II) hexahydrate ( $\text{Ru}(\text{bpy})_3^{2+}$ ), Tris-(2-carboxyethyl) phosphine hydrochloride (TCEP), Tris(hydroxymethyl)aminomethane (Tris-HCl), Nafion (5% in a mixture of lower aliphatic alcohols and water), chloroauric acid ( $\text{HAuCl}_4$ ) and 6-mercapto-1-hexanol (MCH) were purchased from Sigma-Aldrich (USA). Tri-n-propylamine (TPA) and sodium citrate were purchased from Sinopharm Chemical Reagent Co., Ltd. (China). 0.019 M  $\text{NaH}_2\text{PO}_4$ , 0.081 M  $\text{Na}_2\text{HPO}_4$ , and 0.10 M KCl made up 0.10 M phosphate buffer saline (PBS, pH 7.4). 50 mM NaCl and 5.0 mM  $\text{MgCl}_2$  made up 10 mM Tris-HCl buffer (pH 7.4). 10 mM phosphate buffer (PB, pH 7.4) containing 1.9 mM  $\text{NaH}_2\text{PO}_4$  and 8.1 mM  $\text{Na}_2\text{HPO}_4$  was used as washing solution. Every chemical reagent was analytically graded and utilized exactly as supplied, and Millipore Milli-Q water ( $18.2 \text{ M}\Omega \cdot \text{cm}$ ) was used.

All electrochemical experiments were conducted on CHI 660f electrochemical workstation (Chenhua Instruments Co., China). The ECL measurements were performed using an HYZ-3002 ECL detector (Xi'an HeYongZhong Electronic Technology Co, Ltd., China) with photomultiplier tube biased at -500 V. A three-electrode system including a working electrode (modified glassy carbon electrode or Au electrode), a reference electrode (Ag/AgCl (saturated KCl) electrode), and a counter electrode (platinum wire) was employed. The UV-Vis spectroscopy was recorded with a spectrophotometer employed (UV-2450, Shimadzu Corporation, Japan). X-ray photoelectron spectroscopy (XPS) experiments were obtained from Kratos Analytical Axis Ultra photoelectron spectrometer (Kratos Analytical Ltd, Japan).

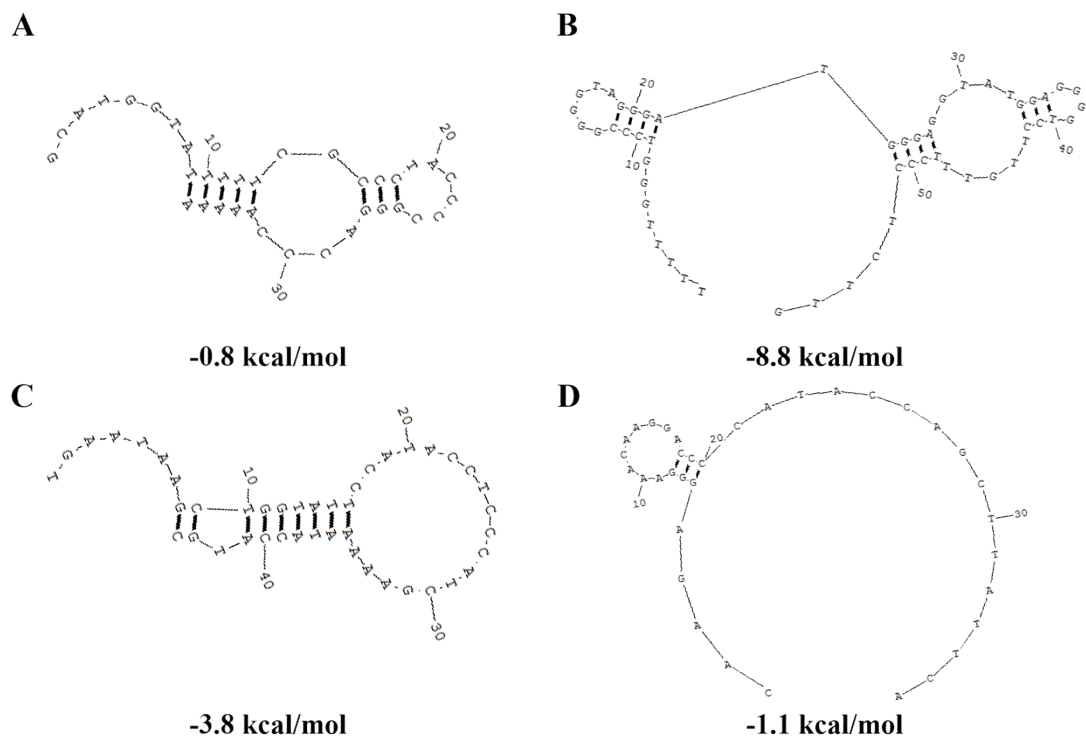

**Fig. S1.** Scheme of different ss-DNA self-hybridization: Capture DNA (A), MC-LR aptamer (B), DNA1 (C) and DNA2 (D).

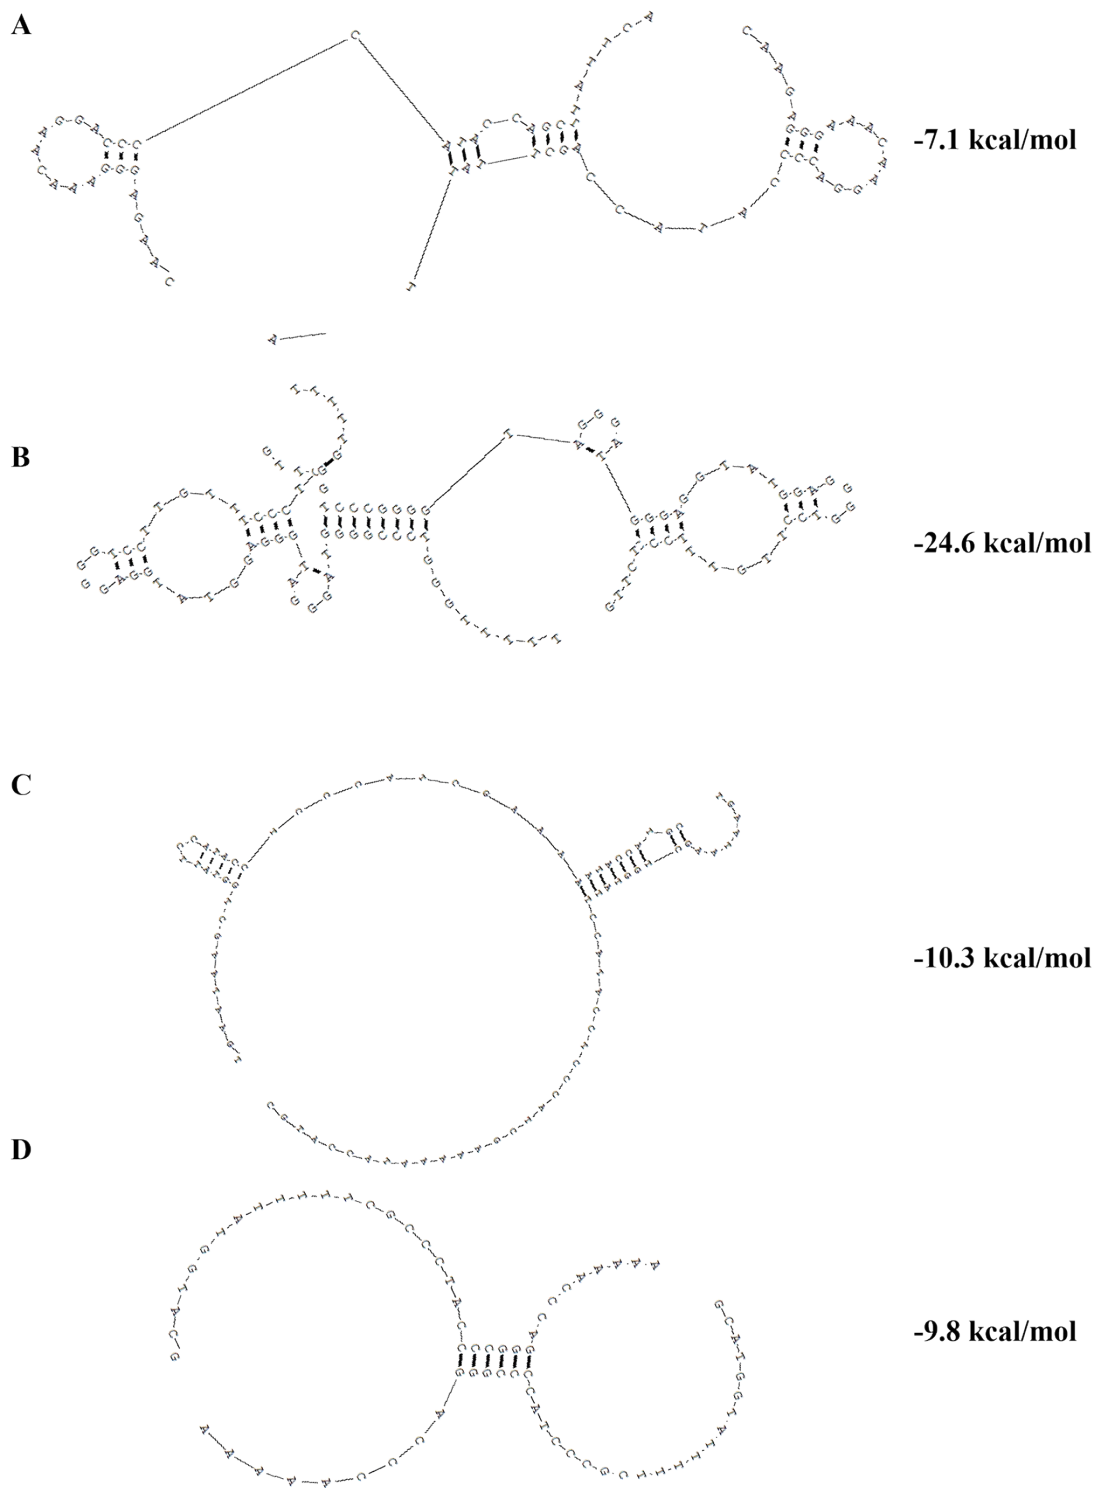

**Fig. S2.** Scheme of hybridization of different ss-DNA probe: two Capture DNAs (A), two MC-LR aptamers (B), two DNA1s (C) and two DNA2s (D).

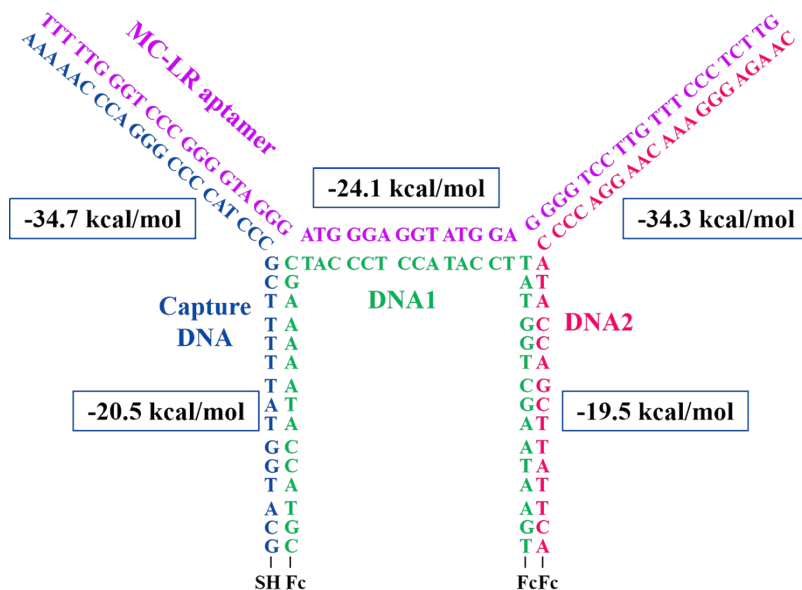

**Fig. S3.** Scheme of hybridization of Capture DNA-MC-LR aptamer, Capture DNA-DNA1, MC-LR aptamer-DNA1, MC-LR aptamer-DNA2 and DNA1-DNA2.

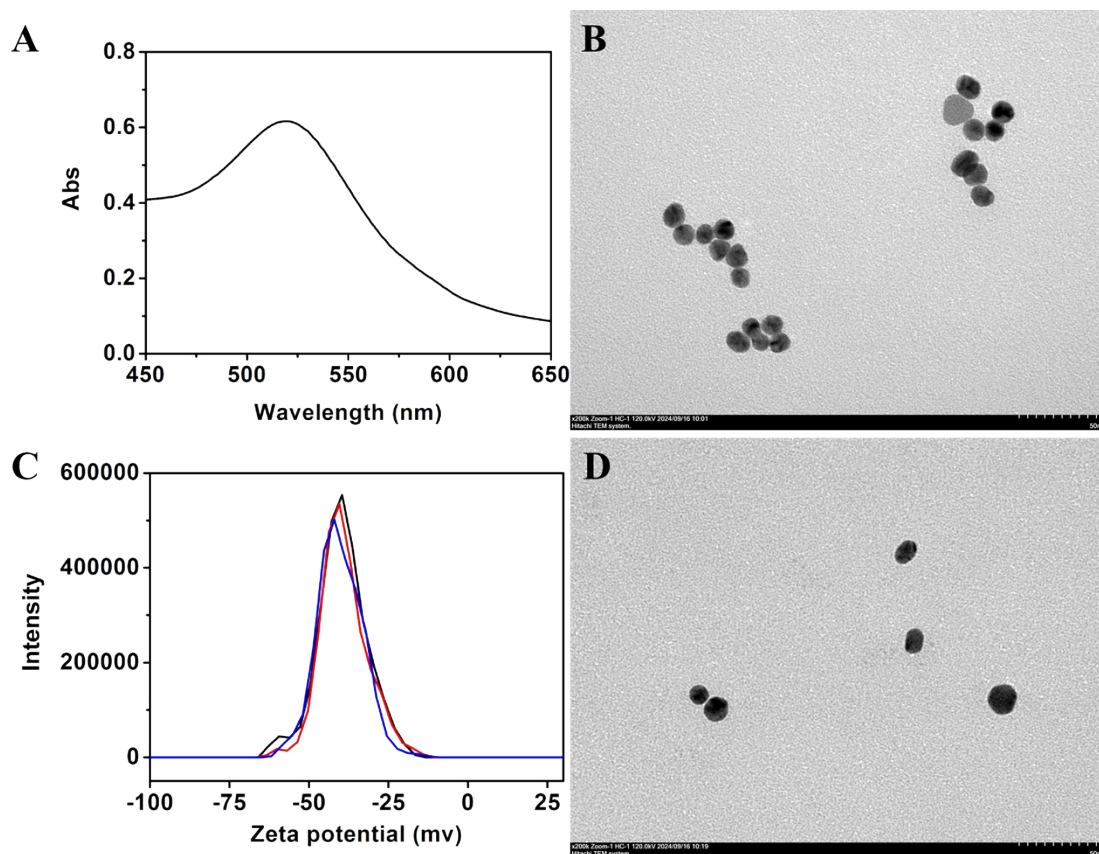

**Fig. S4.** UV-Vis spectrum (A), TEM image (B) and zeta potential (C) from 3 different samples of AuNPs and TEM image of Nafion-AuNPs (D).

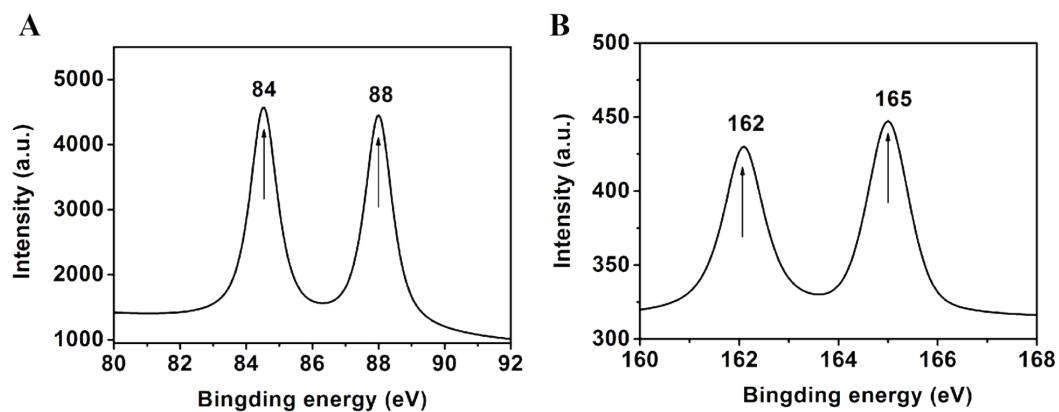

**Fig. S5.** High resolution XPS spectra for (A) Au 4f region and (B) S 2p regions collected from Capture DNA/Nafion/AuNPs film.

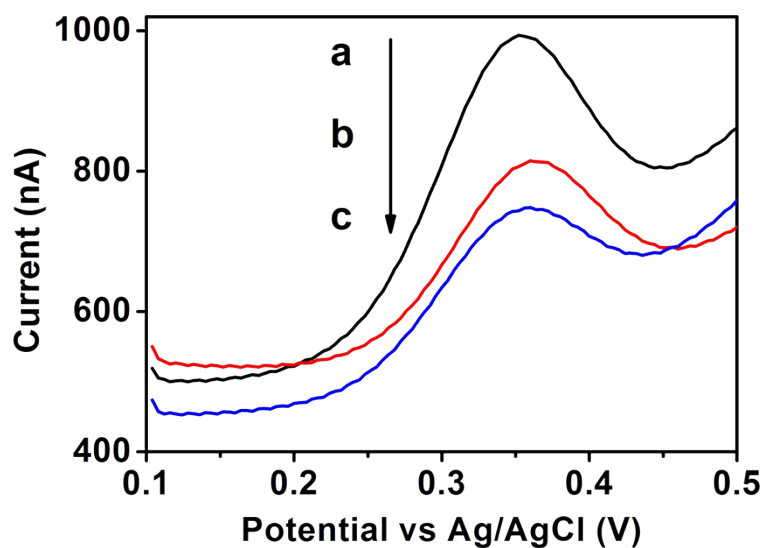

**Fig. S6.** Square wave voltammetric curves of the PLA-based ECL aptasensor (Capture DNA/Au) before (a) and after incubation with 0.05 ng/mL (b) and 0.5 ng/mL (c) MC-LR. The measurement conditions: 0.10 M PBS containing 50 mM TPA (pH 7.4). Init E: 0.1 V; Final E: 0.5 V; Incr E: 0.004 V; Amplitude: 0.05 V; Frequency: 15 Hz.

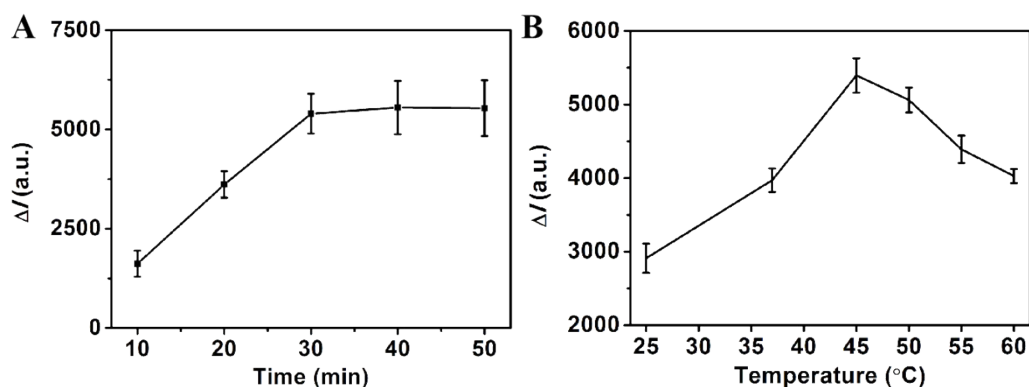

**Fig. S7.** Effects of binding time (A) and hybridization temperature (B) of the PLA-based ECL aptasensor for 0.1 ng/mL MC-LR on the ECL intensities.  $\Delta I = I_S - I_0$ , where  $I_S$  and  $I_0$  were signal and background intensity, respectively.

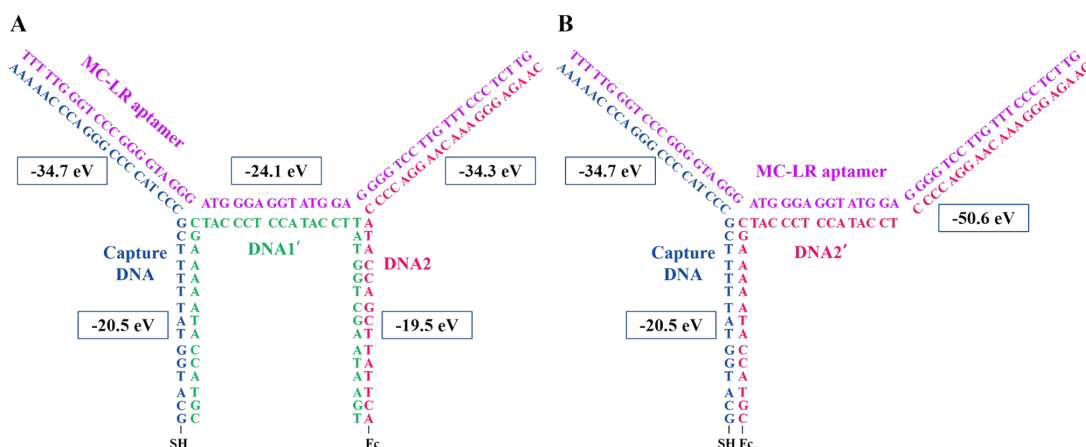

**Fig. S8.** Scheme of hybridization among Capture DNA, MC-LR aptamer, DNA1' and DNA2 (A), Capture DNA, MC-LR aptamer and DNA2' (B).

**Table S1.** Analytical performance for aptasensors or immunosensors based on different methods for MC-LR detection.

| Method                                         | Linear range       | Detection of limit (pg/mL) | Ref |
|------------------------------------------------|--------------------|----------------------------|-----|
| Colormetric aptasensor                         | 4.0-10000 ng/L     | 3.0                        | [1] |
| Colormetric aptasensor                         | 10-150 ng/mL       | 380                        | [2] |
| Colormetric aptasensor                         | 1-200 ng/mL        | 849                        | [3] |
| Colormetric aptasensor                         | 1-50 ng/mL         | 2500                       | [4] |
| Surface-enhanced Raman scattering immunosensor | 0.01-100 $\mu$ g/L | 14                         | [5] |
| Surface-enhanced Raman scattering immunosensor | 1.0-500 ng/mL      | 32                         | [6] |
| Fluorescent aptasensor                         | 5-100 ppb          | 1.9 ppb                    | [7] |

|                               |                  |             |           |
|-------------------------------|------------------|-------------|-----------|
|                               | (5-100 pg/mL)    | (1.9 pg/mL) |           |
| Fluorescent aptasensor        | 0.01-50 ng/mL    | 2           | [8]       |
| Fluorescent aptasensor        | 0.01-1000 µg/L   | 4.8         | [9]       |
| Chemiluminescent immunosensor | 0.23-190 µg/L    | 30          | [10]      |
| Chemiluminescent immunosensor | 0.062-0.65 µg/L  | 32          | [11]      |
| Chemiluminescent immunosensor | 0.02- 200 µg/L   | 6           | [12]      |
| Electrochemical aptasensor    | 0.01-50 ng/mL    | 6           | [13]      |
|                               | 0.1-50 ng/mL     | 45          |           |
| Electrochemical aptasensor    | 0.1-1000 ng/mL   | 4           | [14]      |
| Electrochemical immunosensor  | 0.05-25000 ng/mL | 17          | [15]      |
| Electrochemical immunosensor  | 0.01- 20 µg/L    | 5           | [16]      |
| ECL immunosensor              | 0.01-50 µg/L     | 2.8         | [17]      |
| ECL immunosensor              | 0.005-100 µg/L   | 3.2         | [18]      |
| ECL aptasensor                | 0.01-50 ng/mL    | 5.9         | [19]      |
|                               | 0.01-50 ng/mL    | 1.2         |           |
| ECL aptasensor                | 0.005-5.0 ng/mL  | 1.4         | This Work |

## Reference

- [1] P. Wu, S. Li, X. Ye, B. Ning, J. Bai, Y. Peng, L. Li, T. Han, H. Zhou, Z. Gao and P. Ding, Cu/Au/Pt trimetallic nanoparticles coated with DNA hydrogel as target-responsive and signal-amplification material for sensitive detection of microcystin-LR, *Anal. Chim. Acta*, 2020, **1134**, 96-105.
- [2] J. Feng, Y. Wu and Q. Shen, A simple and selective colorimetric aptasensor for detection of toxins microcystin-LR in fish tissue using a truncated aptamer, *Food Anal. Methods*, 2022, **15**, 2202-2212.
- [3] J. Yu, W. Li, J. Zhao, G. Hao, Z. Feng, F. Han, J. Wang, X. Liu, F. Pi, H. Dai, X. Liu and Y. Shen, A MOF-818-based nanozyme-linked aptasensor for microcystin-LR detection in edible algae powder, *Talanta*, 2025, 128257.
- [4] J. Feng, Y. Wu, J. Zhang, R. Jin, Y. Li, Q. Shen, An aptamer lateral flow assay for visual detection of microcystins-LR residue in fish, *J. Food Compos. Anal.*, 2023, **115**, 105012.
- [5] M. Li, S.K. Paidi, E. Sakowski, S. Preheim and I. Barman, Ultrasensitive detection of hepatotoxic microcystin production from cyanobacteria using surface-enhanced raman scattering immunosensor, *ACS Sens.*, 2019, **4**, 1203-1210.
- [6] L. Wu, L. Jiao, D. Xue, Y. Li, Y. Han, W. Ouyang and Q. Chen, Nanozyme and

- bifunctional nanobody-based colorimetric-SERS dual-mode immunosensor for microcystin-LR detection, *Food Chem.*, 2025, **464**, 141574.
- [7] J. Lee, B. Oh, J. Park, J.Y. Kim, J. Son, H.S. Kim and Y.E. Choi, On-site microfluidic aptasensor for rapid and highly selective detection of microcystin-LR, *Talanta*, 2025, **293**, 128147.
- [8] J. Lv, S. Zhao, S. Wu and Z. Wang, Upconversion nanoparticles grafted molybdenum disulfide nanosheets platform for microcystin-LR sensing, *Biosens. Bioelectron.*, 2017, **90**, 203-209.
- [9] Y. Zhang, Y. Lai, X. Teng, S. Pu, Z. Yang, P. Pang, H. Wang, C. Yang, W. Yang and C.J. Barrow, Facile fluorescence strategy for sensitive detection of microcystin-LR based on dsDNA-templated copper nanoclusters, *Anal. Methods*, 2020, **13**, 1752-1758.
- [10] R. Yang, D. Song, S. Fang, Y. Liu, X. Zhou, F. Long and A. Zhu, Development of novel portable and reusable fiber optical chemiluminescent biosensor and its application for sensitive detection of microcystin-LR, *Biosens. Bioelectron.*, 2018, **121**, 27-33.
- [11] F. Long, H. Shi, M. He, J. Sheng and J. Wang, Sensitive and rapid chemiluminescence enzyme immunoassay for microcystin-LR in water samples, *Anal. Chim. Acta*, 2009, **649**, 123-127.
- [12] J. Lu, W. Wei, L. Yin, Y. Pu and S. Liu, Flow injection chemiluminescence immunoassay of microcystin-LR by using PEI-modified magnetic beads as capturer and HRP-functionalized silica nanoparticles as signal amplifier, *Analyst*, 2013, **138**, 1483-1489.
- [13] J. Wu, C. Yu, Y. Yu, J. Chen, C. Zhang, R. Gao, X. Mu, Y. Geng and J. He, Ultra-sensitive detection of microcystin-LR with a new dual-mode aptasensor based on MoS<sub>2</sub>-PtPd and ZIF-8-Thi-Au, *Sens. Actuat. B-Chem.*, 2020, **305**, 127280.
- [14] W. Zhang, Y. Tu, X. Wang, Y. Huang and F. Xia, In situ growth of metal-organic frameworks in nanochannels for highly sensitive microcystin-LR detection, *Environ. Sci.-Nano*, 2023, **10**, 834-842.
- [15] X. Fu, C. Zhao, X. Liu, J. Zhao, X. Niu, L. Zheng and Y. Yang, A layer-by-layer assembly label-free electrochemical immunosensor for the detection of microcystin-LR based on CHIT/PAMAM dendrimer/silver nanocubes, *Int. J. Environ. Anal. Chem.*, 2016, **96**, 284-297.
- [16] Y. Zhang, M. Chen, H. Li, F. Yan, P. Pang, H. Wang, Z. Wu and W. Yang, A molybdenum disulfide/gold nanorod composite-based electrochemical immunosensor for sensitive and quantitative detection of microcystin-LR in environmental samples, *Sens. Actuat. B-Chem.*, 2017, **244**, 606-615.
- [17] J. Zhang, T. Kang, Y. Hao, L. Lu and S. Cheng, Electrochemiluminescent immunosensor based on CdS quantum dots for ultrasensitive detection of microcystin-LR, *Sens. Actuat. B-Chem.*, 2015, **214**, 117-123.
- [18] J. Zhang, W. Liu, W. Gong, N. Liu, Y. Jia, D. Ding and Z. Ning, Ultrasensitive determination of microcystin-leucine-arginine (MCLR) by an electrochemiluminescence (ECL) immunosensor with graphene nanosheets as a

scaffold for cadmium-selenide quantum dots (QDs), *Anal. Lett.*, 2021, **54**, 2523-2536.

- [19] B. Shi, Y. Jia, D. Jia, T. Tian, J. Chen, X. Ren, J. Lei, H. Jia, H. Wang and Q. Wei, Aggregation-induced electrochemiluminescence of Ir(ppy)<sub>3</sub>-functionalized ZIF-8 for microcystin-LR detection via the trans-cleavage activity of CRISPR-Cas12a, *Anal. Chem.*, 2024, **96**, 15050-15058.
